# Supplementary material
Source: PubMed Central journal article supplement (PMC6031147)
Supplement: NIHMS976384-supplement-supporting_materials.pdf [file NIHMS976384-supplement-supporting_materials.pdf]

## Supporting Information

### Mechanistic Investigation and Multiplexing of Liposome-Assisted Metabolic Glycan Labeling

Yuting Sun,<sup>†,‡</sup> Senlian Hong,<sup>†,§</sup> Ran Xie,<sup>†,°</sup> Rongbing Huang,<sup>†</sup> Ruoxing Lei,<sup>†,¶</sup> Bo Cheng,<sup>†</sup> De-en Sun,<sup>†</sup> Yifei Du,<sup>†</sup> Corwin M. Nycholat,<sup>∇</sup> James C. Paulson,<sup>∇</sup> and Xing Chen<sup>\*,†,§,¶,⊥,♯</sup>

<sup>†</sup>College of Chemistry and Molecular Engineering, <sup>‡</sup>Academy for Advanced Interdisciplinary Studies, <sup>§</sup>Peking-Tsinghua Center for Life Sciences, <sup>||</sup> Beijing National Laboratory for Molecular Sciences, <sup>⊥</sup>Synthetic and Functional Biomolecules Center, and <sup>♯</sup>Key Laboratory of Bioorganic Chemistry and Molecular Engineering of Ministry of Education, Peking University, Beijing 100871, China

<sup>∇</sup>Departments of Molecular Medicine and Immunology and Microbiology, The Scripps Research Institute, La Jolla, California 92037, United States

#### Corresponding Author

\*xingchen@pku.edu.cn

#### Present Addresses

<sup>°</sup>Department of Chemistry and Chemical Biology, Harvard University, Cambridge, Massachusetts 02138, United States

<sup>¶</sup>Department of Chemistry, University of California, Berkeley, California 94720, United States

## Contents:

|                         |     |
|-------------------------|-----|
| Supporting Table .....  | S3  |
| Supporting Figures..... | S4  |
| Figure S1 .....         | S4  |
| Figure S2 .....         | S5  |
| Figure S3 .....         | S6  |
| Figure S4 .....         | S7  |
| Figure S5 .....         | S8  |
| Figure S6 .....         | S9  |
| Figure S7 .....         | S10 |
| Figure S8 .....         | S11 |
| Figure S9 .....         | S12 |
| Figure S10 .....        | S13 |
| Figure S11 .....        | S14 |
| Figure S12 .....        | S15 |
| Figure S13 .....        | S16 |

## Supporting Table

**Table S1. Characterization of liposome size and sugar/lipid molar ratio**

| <b>Liposome samples</b>        | <b>Effective diameter (nm)*</b> | <b>Sugar/lipids (molar ratio)</b> |
|--------------------------------|---------------------------------|-----------------------------------|
| f-LP-9AzSia                    | 149.8 ± 1.3                     | 1.21                              |
| LP-9AzSia                      | 137.5 ± 4.8                     | 1.24                              |
| f/DiI-LP-9AzSia                | 159.6 ± 0.9                     | 1.03                              |
| DiI-LP-9AzSia                  | 144.4 ± 11.1                    | 0.90                              |
| f/DiI-LP-calcein               | 160.1 ± 2.1                     | -                                 |
| DiI-LP-calcein                 | 144.3 ± 10.3                    | -                                 |
| LP-calcein                     | 173.5 ± 4.5                     | -                                 |
| Sgc8-LP-9AzSia                 | 207.3 ± 0.8                     | 1.04                              |
| tras-LP-9AzSia                 | 242.4 ± 3.6                     | 0.98                              |
| RGD-LP-9AzSia                  | 211.3 ± 1.3                     | 1.21                              |
| <sup>BPC</sup> NeuAc-LP-9AzSia | 139.6 ± 1.4                     | 1.20                              |
| <sup>MPB</sup> NeuAc-LP-9AzSia | 135.2 ± 2.3                     | 0.96                              |
| LP-SiaNAI                      | 207.8 ± 0.6                     | 1.17                              |
| <sup>BPC</sup> NeuAc-LP-SiaNAI | 209.8 ± 0.7                     | 1.25                              |

\*The effective diameter data are mean ± standard deviation of three independent measurements.

## Supporting Figures

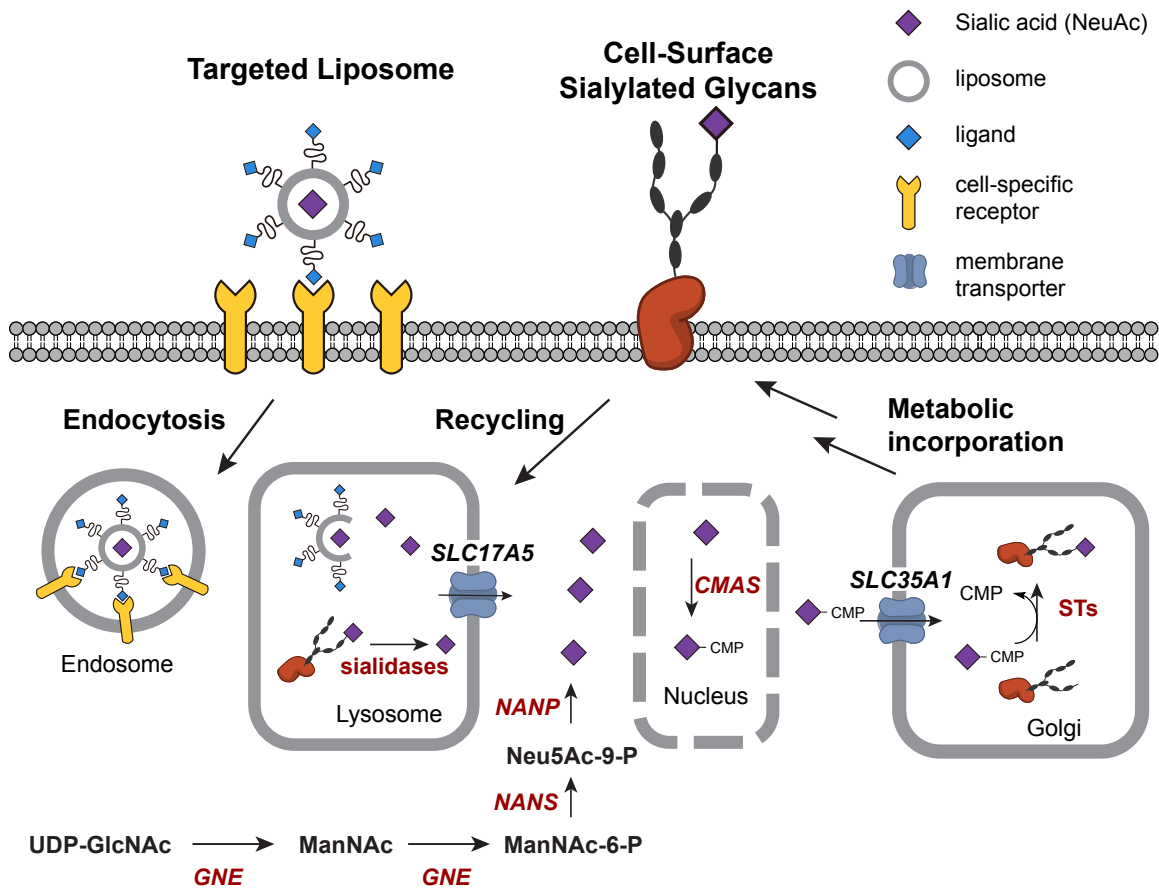

**Figure S1.** Overview of the *de novo* biosynthetic pathway and salvage pathway of sialic acid. UDP-GlcNAc 2-Epimerase/ManNAc Kinase (*GNE*); NeuAc 9-phosphate synthase (*NANS*); NeuAc 9-phosphate phosphatase (*NANP*); CMP-sialic acid synthase (*CMAS*); STs, sialyltransferases. Uridine diphosphate *N*-acetylglucosamine (UDP-GlcNAc); *N*-acetylmannosamine (ManNAc); ManNAc-6-phosphate (ManNAc-6-P); Neu5Ac-9-phosphate (Neu5Ac-9-P).

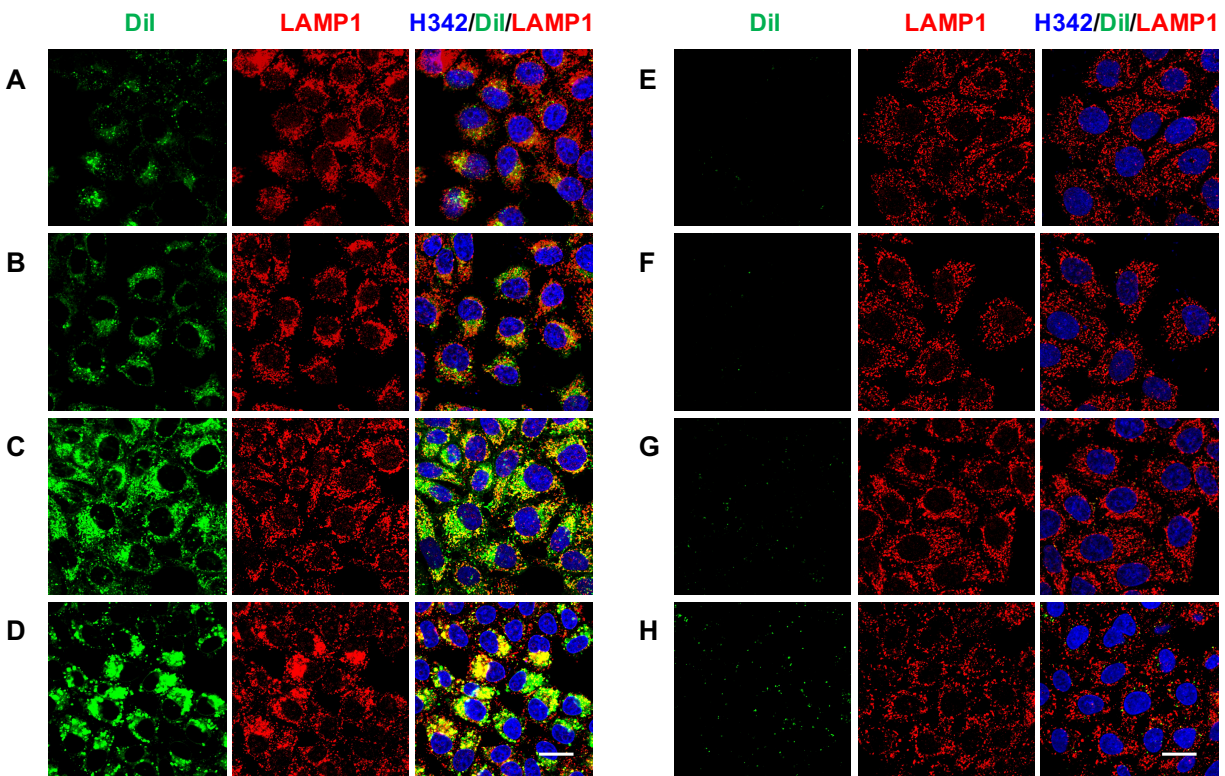

**Figure S2.** Co-localization of f/DiI-LP-9AzSia with lysosome. FR<sup>+</sup> HeLa cells were incubated with 100  $\mu$ M f/DiI-LP-9AzSia (A–D) or DiI-LP-9AzSia (E–H) for 0.5 h. The cells were changed into fresh medium and incubated to the time point of 1.5 h (A, E), 3 h (B, F), 6 h (C, G) or 24 h (D, H). The cells were then fixed with 4% PFA and permeabilized with 0.1% Triton X-100, followed by immunostaining with anti-LAMP1 (red) and imaging by confocal fluorescence microscopy. The liposomes were tracked with DiI (green), and the nuclei were stained with Hoechst 33342 (blue). Notably, the DiI fluorescence was not observed on the cell surfaces, presumably due to loss of cell surface-bound liposomes during fixation and permeabilization. Scale bar, 20  $\mu$ m.

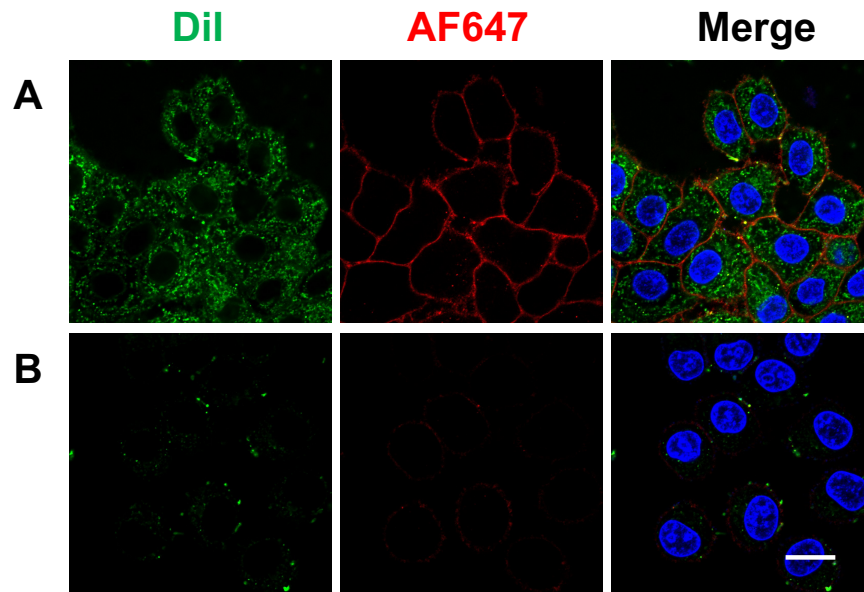

**Figure S3.** Fluorescence imaging of cell-surface sialoglycans labeled with 9AzSia. FR<sup>+</sup> HeLa cells were incubated with 100  $\mu$ M f/DiI-LP-9AzSia (A) or DiI-LP-9AzSia (B) for 24 h. After reaction with alkyne-biotin and staining with streptavidin-AF647, the cells were imaged by confocal fluorescence microscopy. The liposomes were tracked with DiI (green), and the nuclei were stained with Hoechst 33342 (blue). Scale bar, 20  $\mu$ m.

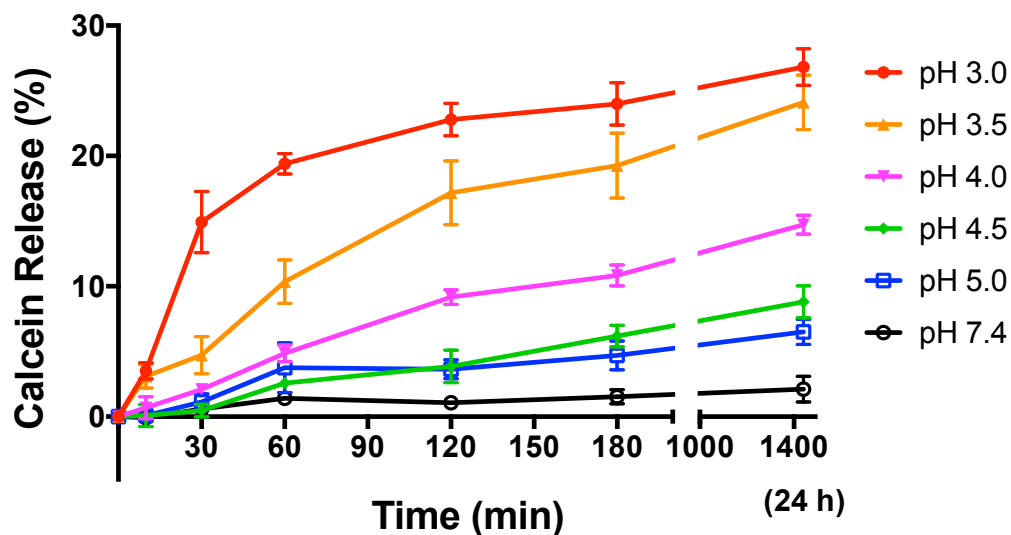

**Figure S4.** Release of calcein from liposomes at various pH values. The 40  $\mu\text{M}$  LP-calcein (300 mM calcein inside liposomes) solutions were incubated at 37  $^{\circ}\text{C}$  at varied pH values for a spectrum of time points with a final lipid concentration of 100  $\mu\text{M}$ . Calcein fluorescence was measured at  $\lambda_{\text{ex}} = 490$  and  $\lambda_{\text{em}} = 520$  nm on a plate reader. The percentage of calcein release was calculated according to the following formula:  $(I_{\text{pH}} - I_0)/(I_{100} - I_0) \times 100\%$ , where  $I_0$  is the fluorescence before incubation at 37  $^{\circ}\text{C}$ ,  $I_{\text{pH}}$  is the intensity measured at various pH, and  $I_{100}$  is the totally dequenched calcein fluorescence. Error bars represent  $\pm$  SD.

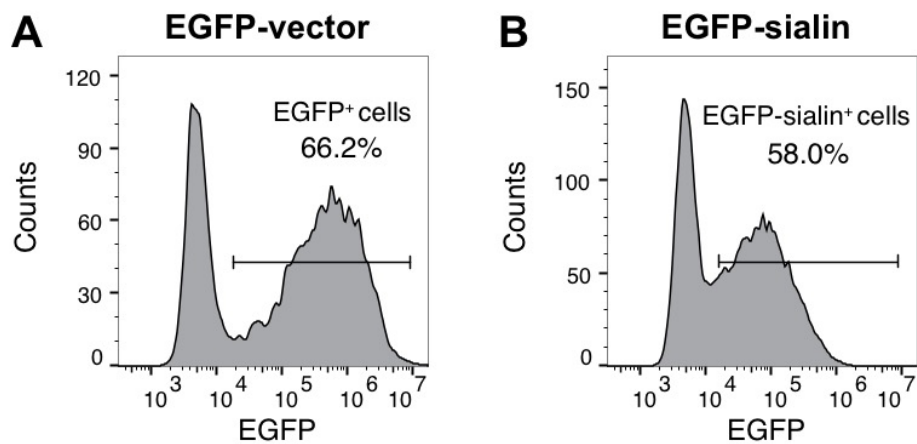

**Figure S5.** Transfection efficiency analysis of FR<sup>+</sup> HeLa cells transfected with EGFP-vector (A) and EGFP-sialin (B). The cells were transfected by electroporation and cultured for two days, followed by analysis by flow cytometry. The EGFP fluorescence was used to gate the EGFP- or EGFP-sialin-overexpressed cell populations.



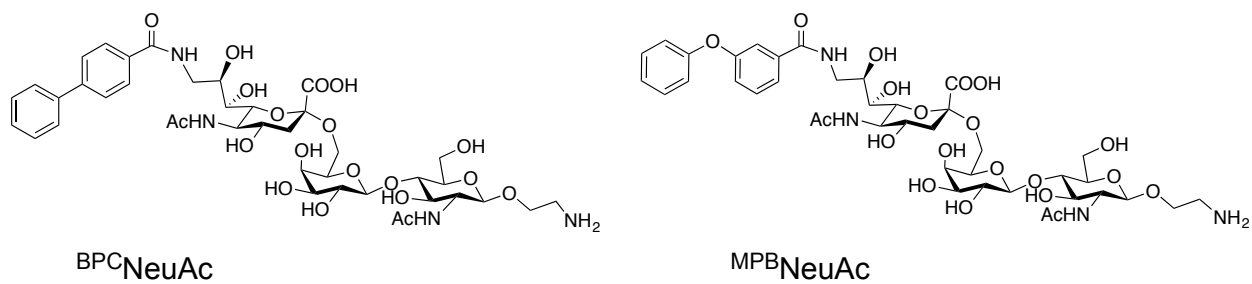

**Figure S6.** Chemical structures of human CD22 glycan ligands <sup>BPC</sup>NeuAc and <sup>MPB</sup>NeuAc with a β-O-linked ethylamine linker.

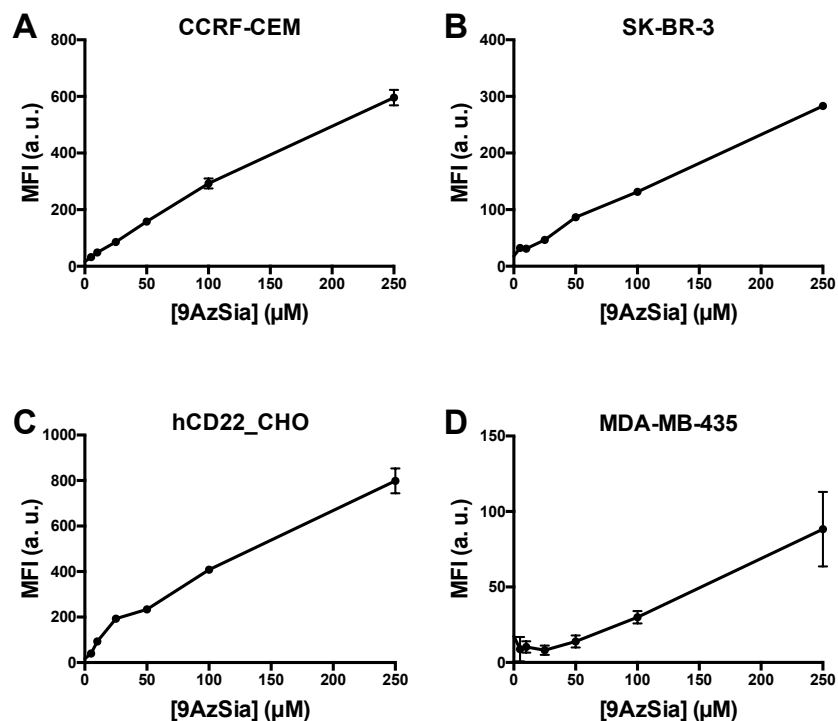

**Figure S7.** Metabolic incorporation of 9AzSia in CCRF-CEM (A), SK-BR-3 (B), hCD22\_CHO (C), and MDA-MB-435 cells (D). The cells were incubated with 9AzSia at varied concentrations for 24 h, followed by reaction with DBCO-biotin and staining with streptavidin-AF647. The cells were then analyzed by flow cytometry. MFI, mean fluorescence intensity. a. u., arbitrary unit. Error bars represent  $\pm$  SD.

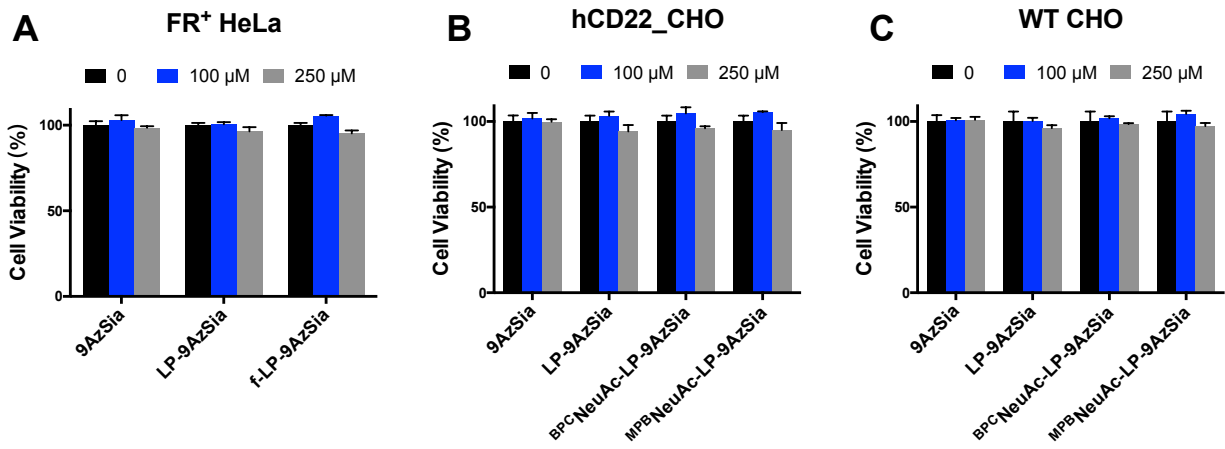

**Figure S8.** Cell viability analysis. FR<sup>+</sup> HeLa cells (A), hCD22\_CHO cells (B), and WT CHO cells (C) were incubated with 9AzSia or various liposomes at varied concentrations for 24 h, followed by analysis of cell viability by the MTS assay. Error bars represent  $\pm$  SD.

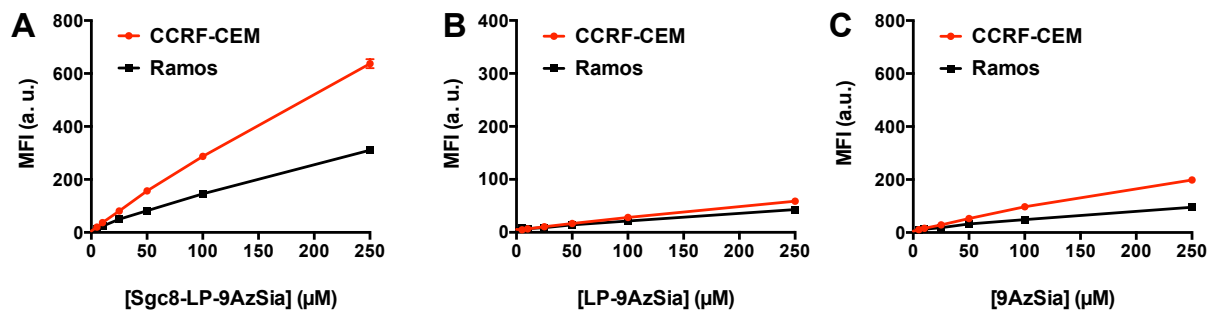

**Figure S9.** Cell-selective labeling of sialoglycans by Sgc8-LP-9AzSia. CCRF-CEM and Ramos cells were treated with Sgc8-LP-9AzSia (A), LP-9AzSia (B), or 9AzSia (C) at varied concentrations for 24 h. The cells were then reacted with DBCO-biotin, stained with streptavidin-AF647, and analyzed by flow cytometry. MFI, mean fluorescence intensity. a. u., arbitrary unit. Error bars represent  $\pm$  SD.

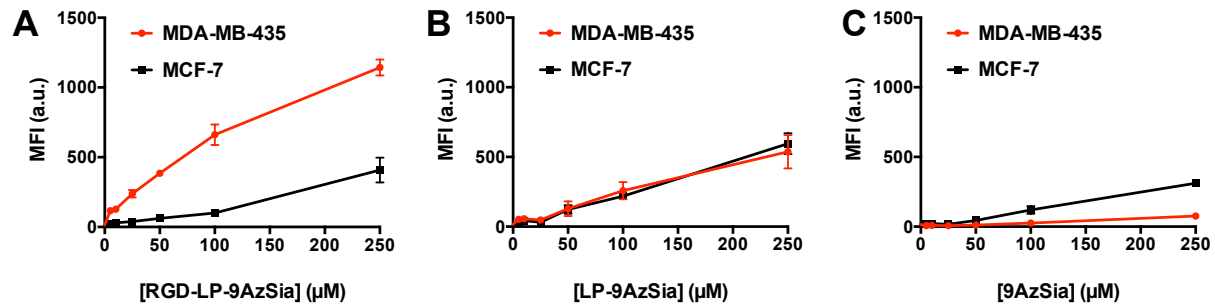

**Figure S10.** Cell-selective labeling of sialoglycans by RGD-LP-9AzSia. MDA-MB-435 and MCF-7 cells were treated with RGD-LP-9AzSia (A), LP-9AzSia (B), or 9AzSia (C) at varied concentrations for 24 h. The cells were then reacted with DBCO-biotin, stained with streptavidin-AF647, and analyzed by flow cytometry. MFI, mean fluorescence intensity. a. u., arbitrary unit. Error bars represent  $\pm$  SD.

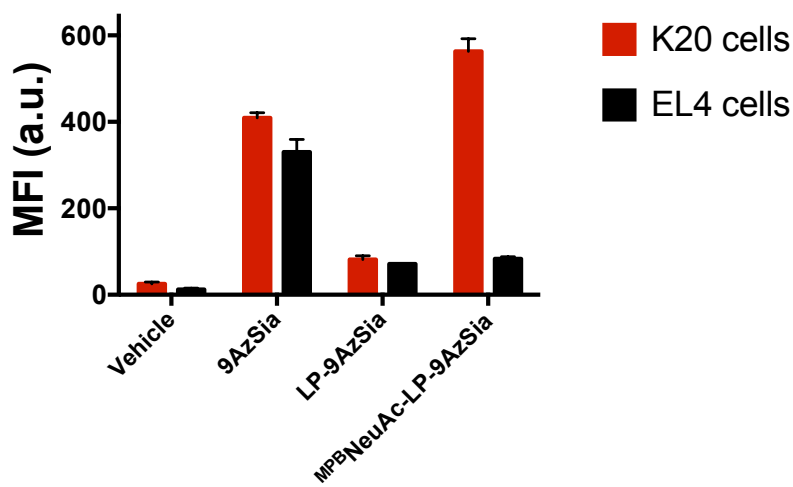

**Figure S11.** Flow cytometry analysis of 9AzSia metabolic labeling in K20 and EL4 cells. The cells were treated with 1 mM free 9AzSia (positive control), 100  $\mu$ M LP-9AzSia or 100  $\mu$ M <sup>MPB</sup>NeuAc-LP-9AzSia for 24 h. The cells were then reacted with DBCO-biotin, stained with streptavidin-AF647, and analyzed by flow cytometry. Blank sample referred to untreated cells subject to reaction with DBCO-biotin and streptavidin-AF647. MFI, mean fluorescence intensity. a. u., arbitrary unit. Error bars represent  $\pm$  SD.

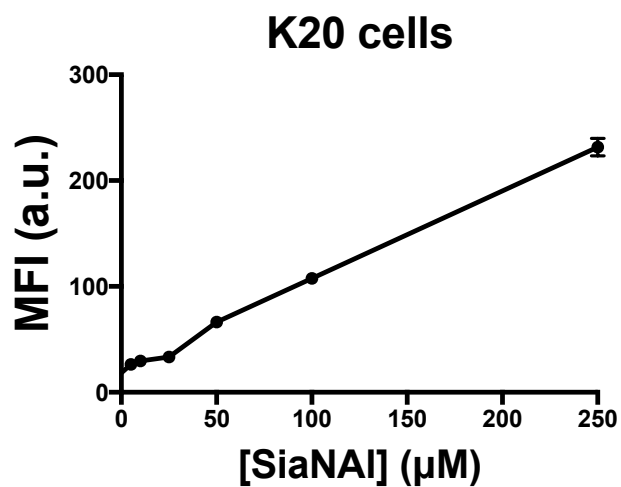

**Figure S12.** Metabolic incorporation of SiaNAI in K20 cells. The cells were incubated with SiaNAI at varied concentrations for 24 h, followed by reaction with 50 μM azide-AF647 via CuAAC and analyzed by flow cytometry. MFI, mean fluorescence intensity. a. u., arbitrary unit. Error bars represent  $\pm$  SD.

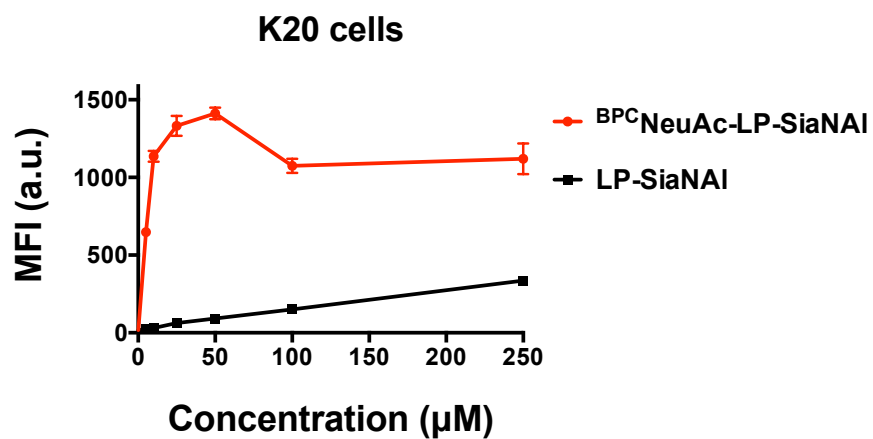

**Figure S13.** Metabolic incorporation of liposome-encapsulated SiaNAI in K20 cells. The cells were incubated with <sup>BPC</sup>NeuAc-LP-SiaNAI or LP-SiaNAI at varied concentrations for 24 h, followed by reaction with 50 µM azide-AF647 via CuAAC and analyzed by flow cytometry. MFI, mean fluorescence intensity. a. u., arbitrary unit. Error bars represent ± SD.
